# Supplementary material for: Synthesis of nickel germanide (Ge12Ni19) nanoparticles for durable hydrogen evolution reaction in acid solutions
Source: Royal Society of Chemistry journal article supplement (doi:10.1039/c7nr09475b), 2018-01-01
Supplement: c7nr09475b1.pdf [file c7nr09475b1.pdf]

# **Supporting Information**

## **Synthesis of Nickel Germanide (Ge<sub>12</sub>Ni<sub>19</sub>) Nanoparticles for Durable Hydrogen Evolution Reaction in Acid Solutions**

*Jee-Yee Chen, Shao-Lou Jheng and Hsing-Yu Tuan\**

†Department of Chemical Engineering, National Tsing Hua University, Hsinchu 30013,  
Taiwan. E-mail: [hytuan@che.nthu.edu.tw](mailto:hytuan@che.nthu.edu.tw)

AUTHOR EMAIL ADDRESS: [a1593577852@hotmail.com](mailto:a1593577852@hotmail.com), [jeeyeechen@gmail.com](mailto:jeeyeechen@gmail.com)

\*Corresponding author.

Phone: (886)3-571-5131

Email: [hytuan@che.nthu.edu](mailto:hytuan@che.nthu.edu).

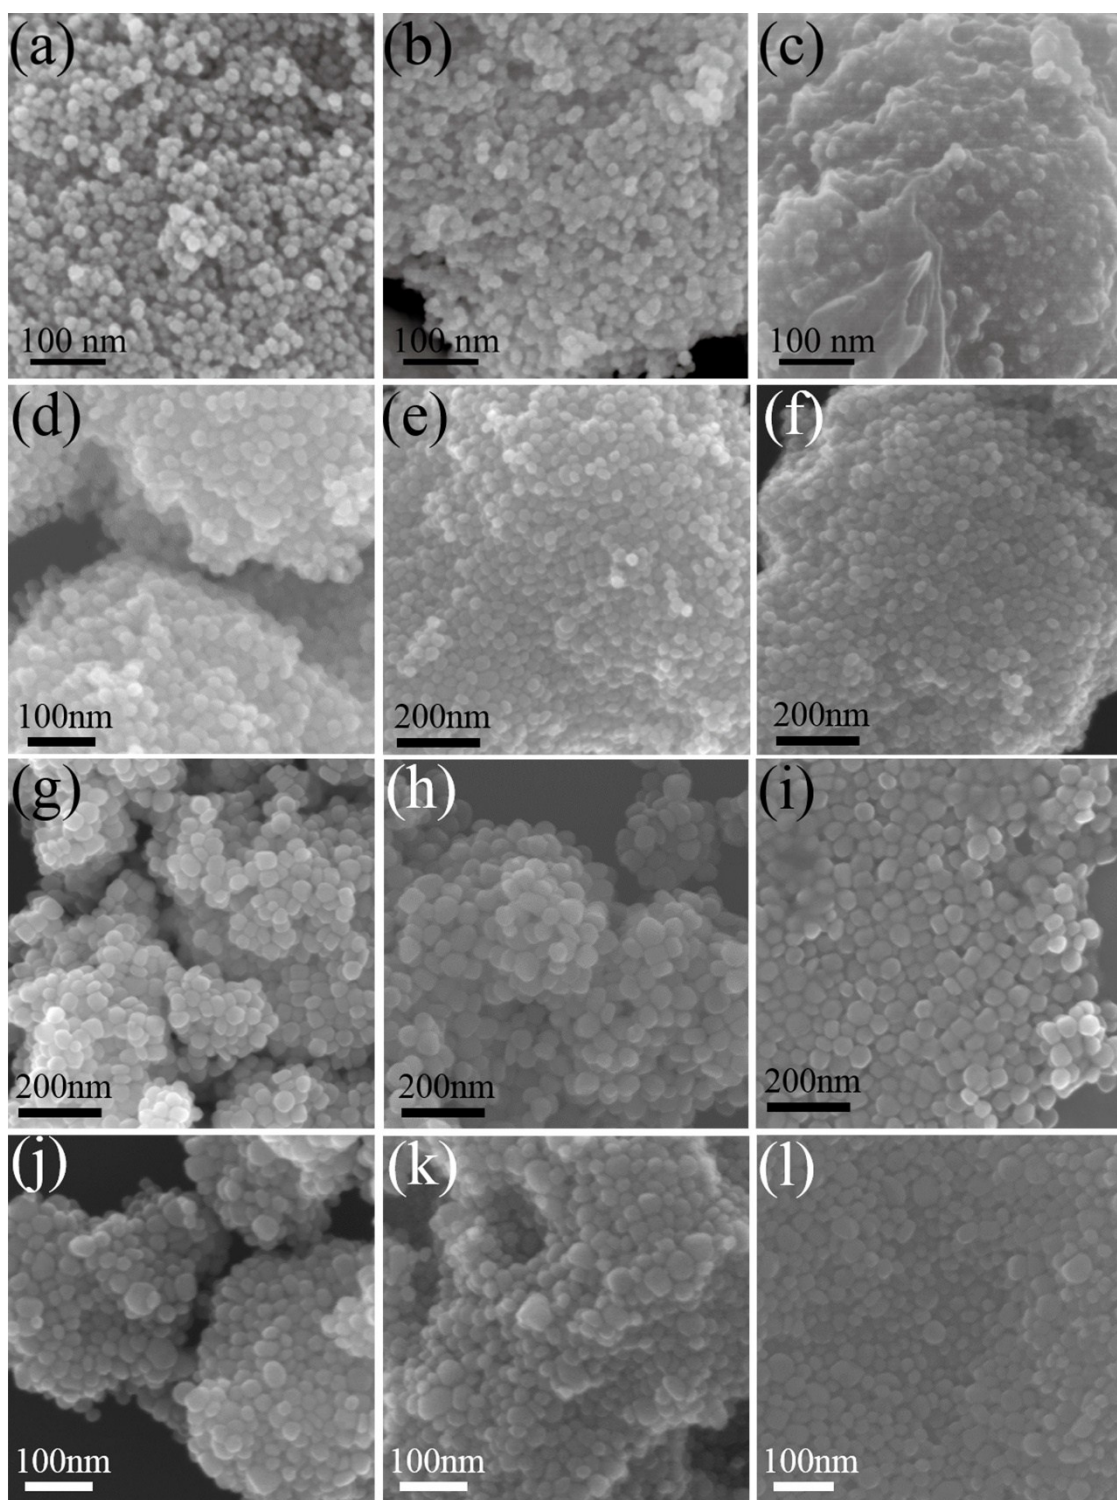

**Figure S1.** SEM images of Ge<sub>12</sub>Ni<sub>19</sub> nanoparticles sonicated in four different washing solvent: (a - c) THF, (d - f) toluene, (g - i) acetic acid, and (j - l) Saturated NaBH<sub>4</sub> in THF for different time: (a, d, g, h) 30 minutes, (b, e, h, k) 60 minutes and (c, f, i, l) 90 minutes.

**The calculation for the energy conversion.**

$$\text{Electrolysis voltage} = 2.2 \text{ V}$$

$$\text{Electrolysis current} = 120 \text{ mA}$$

$$\begin{aligned}\text{Consumption wattage} &= 2.2 \text{ V} \times 0.12 \text{ A} \\ &= 0.264 \text{ W}\end{aligned}$$

$$\begin{aligned}\text{Hydrogen evolution rate} &= 0.12 \text{ A} \\ &= 5.7 \times 10^{-7} \text{ mol s}^{-1} \\ &= 0.163 \text{ J s}^{-1} \\ &= 0.063 \text{ W}\end{aligned}$$

$$\begin{aligned}\text{Electrolysis efficiency} &= \frac{\text{Hydrogen evolution rate}}{\text{Consumption wattage}} \\ &= \frac{0.163 \text{ W}}{0.264 \text{ W}} \\ &= 61.7 \%\end{aligned}$$
